# Supplementary material for: Cu8GeSe6-based thermoelectric materials with an argyrodite structure
Source: Royal Society of Chemistry journal article supplement (doi:10.1039/c6tc05068a), 2016-12-20
Supplement: c6tc05068a1.pdf [file c6tc05068a1.pdf]

## Electronic Supplementary Information

### Calculations for the Grüneisen parameter in $\text{Cu}_8\text{GeSe}_6$ :

The Grüneisen parameter is estimated by <sup>1</sup>

$$\kappa_L = A \frac{M_{avg} \Theta_D^3 \delta}{\gamma^2 n^{2/3} T}, \quad (1)$$

where  $\kappa_L$  is the lattice thermal conductivity,  $M_{avg}$  is the average mass per atom,  $\delta$  is the average volume per atom,  $n$  is the number of atoms in the primitive unit cell ( $n = 90$  for  $\text{Cu}_8\text{GeSe}_6$ ), and  $A$  is a collection of physical constants ( $A = 3.1 \times 10^{-6}$  if  $\kappa$  is in  $\text{W m}^{-1} \text{K}^{-1}$ ,  $M_{avg}$  is in amu, and  $\delta$  is in Angstroms).

**Table S1** Chemical composition of  $\text{Cu}_8\text{GeSe}_6$ ,  $\text{Cu}_8\text{GeSe}_{5.1}\text{Te}_{0.9}$  and  $\text{Cu}_{7.6}\text{Ag}_{0.4}\text{GeSe}_{5.1}\text{Te}_{0.9}$  measured by EDS at 10 randomly selected locations.

| <b>Nominal composition: <math>\text{Cu}_8\text{GeSe}_6</math></b>                                          |                                                          |       |       |       |       |       |       |       |       |       |
|------------------------------------------------------------------------------------------------------------|----------------------------------------------------------|-------|-------|-------|-------|-------|-------|-------|-------|-------|
| <b>Actual composition: <math>\text{Cu}_{7.95}\text{GeSe}_{5.98}</math></b>                                 |                                                          |       |       |       |       |       |       |       |       |       |
| <b>elements</b>                                                                                            | <b>Atomic percent concentration (normalized to 100%)</b> |       |       |       |       |       |       |       |       |       |
| <b>Cu</b>                                                                                                  | 53.28                                                    | 53.35 | 53.05 | 53.38 | 53.21 | 53.19 | 53.46 | 53.26 | 53.32 | 52.92 |
| <b>Ge</b>                                                                                                  | 6.49                                                     | 6.81  | 6.59  | 6.75  | 6.53  | 6.74  | 6.82  | 6.77  | 6.72  | 6.75  |
| <b>Se</b>                                                                                                  | 40.24                                                    | 40.02 | 40.36 | 39.87 | 40.26 | 40.08 | 39.72 | 39.96 | 39.96 | 40.29 |
| <b>Nominal composition: <math>\text{Cu}_8\text{GeSe}_{5.1}\text{Te}_{0.9}</math></b>                       |                                                          |       |       |       |       |       |       |       |       |       |
| <b>Actual composition: <math>\text{Cu}_{7.86}\text{GeSe}_{5.03}\text{Te}_{0.88}</math></b>                 |                                                          |       |       |       |       |       |       |       |       |       |
| <b>elements</b>                                                                                            | <b>Atomic percent concentration (normalized to 100%)</b> |       |       |       |       |       |       |       |       |       |
| <b>Cu</b>                                                                                                  | 52.99                                                    | 54.19 | 53.74 | 53.56 | 52.12 | 53.48 | 52.98 | 53.23 | 53.11 | 53.09 |
| <b>Ge</b>                                                                                                  | 6.94                                                     | 6.70  | 6.98  | 7.00  | 6.60  | 6.62  | 6.82  | 6.60  | 6.59  | 6.83  |
| <b>Se</b>                                                                                                  | 34.22                                                    | 33.14 | 33.47 | 33.45 | 35.24 | 33.90 | 34.63 | 33.87 | 34.57 | 33.92 |
| <b>Te</b>                                                                                                  | 5.85                                                     | 5.98  | 5.81  | 5.99  | 6.04  | 6.01  | 5.98  | 6.30  | 5.73  | 6.15  |
| <b>Nominal composition: <math>\text{Cu}_{7.6}\text{Ag}_{0.4}\text{GeSe}_{5.1}\text{Te}_{0.9}</math></b>    |                                                          |       |       |       |       |       |       |       |       |       |
| <b>Actual composition: <math>\text{Cu}_{7.45}\text{Ag}_{0.37}\text{GeSe}_{5.04}\text{Te}_{0.86}</math></b> |                                                          |       |       |       |       |       |       |       |       |       |
| <b>elements</b>                                                                                            | <b>Atomic percent concentration (normalized to 100%)</b> |       |       |       |       |       |       |       |       |       |
| <b>Cu</b>                                                                                                  | 50.33                                                    | 50.44 | 50.30 | 50.39 | 50.87 | 50.58 | 50.63 | 50.72 | 50.70 | 50.66 |
| <b>Ag</b>                                                                                                  | 2.65                                                     | 2.55  | 2.44  | 2.43  | 2.49  | 2.50  | 2.51  | 2.58  | 2.48  | 2.51  |
| <b>Ge</b>                                                                                                  | 6.78                                                     | 6.71  | 6.86  | 6.75  | 6.73  | 6.86  | 6.73  | 6.84  | 6.68  | 6.92  |
| <b>Se</b>                                                                                                  | 34.47                                                    | 34.53 | 34.35 | 34.37 | 34.10 | 34.19 | 34.25 | 34.00 | 34.19 | 34.00 |
| <b>Te</b>                                                                                                  | 5.78                                                     | 5.78  | 5.80  | 5.82  | 5.81  | 5.86  | 5.88  | 5.87  | 5.96  | 5.92  |

**Table S2** Parameters used to fit the heat capacity ( $C_p$ ) data of  $\text{Cu}_8\text{GeSe}_6$ ,  $\text{Cu}_8\text{GeSe}_{5.1}\text{Te}_{0.9}$ , and  $\text{Cu}_{7.6}\text{Ag}_{0.4}\text{GeSe}_{5.1}\text{Te}_{0.9}$  by using a Debye and two Einstein modes.  $R^2$  stands for the correlation coefficient. The Debye temperature ( $\Theta_D$ ) is derived by the equation  $\Theta_D = (12\pi^4 p R / 5\beta)^{1/3}$ , where  $R$  is the gas constant and  $p$  is the number of atoms in each molecule ( $p = 15$  for our samples).

| <b>Fitting parameters</b>                              | <b><math>\text{Cu}_8\text{GeSe}_6</math></b> | <b><math>\text{Cu}_8\text{GeSe}_{5.1}\text{Te}_{0.9}</math></b> | <b><math>\text{Cu}_{7.6}\text{Ag}_{0.4}\text{GeSe}_{5.1}\text{Te}_{0.9}</math></b> |
|--------------------------------------------------------|----------------------------------------------|-----------------------------------------------------------------|------------------------------------------------------------------------------------|
| $\varphi$ ( $10^{-3} \text{Jmol}^{-1} \text{K}^{-2}$ ) | 26.68±2.79                                   | 49.76±3.01                                                      | 42.01±2.79                                                                         |
| $\beta$ ( $10^{-4} \text{Jmol}^{-1} \text{K}^{-4}$ )   | 10.5±0.332                                   | 11.1±0.332                                                      | 12.1±0.318                                                                         |
| $A$ ( $\text{Jmol}^{-1} \text{K}^{-1}$ )               | 16.335±0.597                                 | 14.094±0.642                                                    | 14.196±0.548                                                                       |
| $\Theta_{E1}$ (K)                                      | 36.426±0.419                                 | 35.953±0.515                                                    | 33.812±0.363                                                                       |

|                                           |              |              |              |
|-------------------------------------------|--------------|--------------|--------------|
| $B$ (Jmol <sup>-1</sup> K <sup>-1</sup> ) | 78.851±1.697 | 77.774±1.584 | 79.023±1.457 |
| $\Theta_{E2}$ (K)                         | 82.110±0.920 | 79.854±0.921 | 76.170±0.765 |
| $\Theta_D$ (K)                            | 302.81       | 297.3        | 288.83       |
| $R^2$                                     | 0.99994      | 0.99988      | 0.99986      |
| $\chi^2$                                  | 0.0000585    | 0.000111     | 0.000148     |

**Table S3** Parameters used to fit the heat capacity ( $C_p$ ) data of Cu<sub>8</sub>GeSe<sub>6</sub> by using different methods (one Debye and one Einstein modes, one Debye and two Einstein modes, one Debye and three Einstein modes).

| Fitting parameters                                               | One Debye+<br>One Einstein | One Debye+<br>Three Einstein |
|------------------------------------------------------------------|----------------------------|------------------------------|
| $\varphi$ (10 <sup>-3</sup> Jmol <sup>-1</sup> K <sup>-2</sup> ) | 80.43±14.62                | 11.38±3.76                   |
| $\beta$ (10 <sup>-4</sup> Jmol <sup>-1</sup> K <sup>-4</sup> )   | 19.2±0.822                 | 8.7±0.385                    |
| $A$ (Jmol <sup>-1</sup> K <sup>-1</sup> )                        | 46.088±2.303               | 4.202±1.399                  |
| $\Theta_{E1}$ (K)                                                | 53.908±1.084               | 26.722±2.021                 |
| $B$ (Jmol <sup>-1</sup> K <sup>-1</sup> )                        |                            | 24.552±1.844                 |
| $\Theta_{E2}$ (K)                                                |                            | 47.957±2.773                 |
| $C$ (Jmol <sup>-1</sup> K <sup>-1</sup> )                        |                            | 82.919±1.792                 |
| $\Theta_{E3}$ (K)                                                |                            | 92.645±2.267                 |
| $\Theta_D$ (K)                                                   | 247.63                     | 322.40                       |
| $R^2$                                                            | 0.99618                    | 0.99998                      |
| $\chi^2$                                                         | 0.00362                    | 0.0000173                    |

**Table S4** Parameters used to fit the lattice thermal conductivity ( $\kappa_L$ ) of Cu<sub>7.6</sub>Ag<sub>0.4</sub>GeSe<sub>5.1</sub>Te<sub>0.9</sub>.

| Fitting parameters                         | Cu <sub>7.6</sub> Ag <sub>0.4</sub> GeSe <sub>5.1</sub> Te <sub>0.9</sub> |
|--------------------------------------------|---------------------------------------------------------------------------|
| $L$ (μm)                                   | 0.634                                                                     |
| $A$ (10 <sup>-41</sup> s <sup>3</sup> )    | 14.304                                                                    |
| $B$ (10 <sup>-17</sup> s K <sup>-1</sup> ) | 2.8848                                                                    |
| $C_1$ (10 <sup>36</sup> s <sup>-3</sup> )  | 0.1206                                                                    |
| $\omega_1$ (THz)                           | 3.442                                                                     |
| $C_2$ (10 <sup>36</sup> s <sup>-3</sup> )  | 19.55                                                                     |
| $\omega_2$ (THz)                           | 6.889                                                                     |
| $R^2$                                      | 0.99800                                                                   |
| $\chi^2$                                   | 0.005987                                                                  |

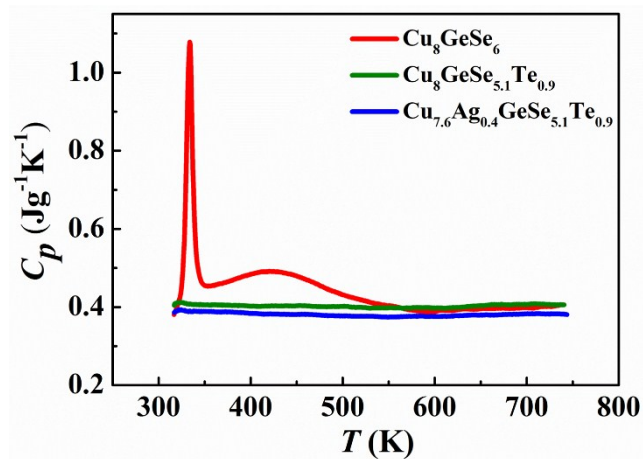

**Fig. S1** Temperature dependence of the heat capacity for  $\text{Cu}_8\text{GeSe}_6$ ,  $\text{Cu}_8\text{GeSe}_{5.1}\text{Te}_{0.9}$  and  $\text{Cu}_{7.6}\text{Ag}_{0.4}\text{GeSe}_{5.1}\text{Te}_{0.9}$  at constant pressure.

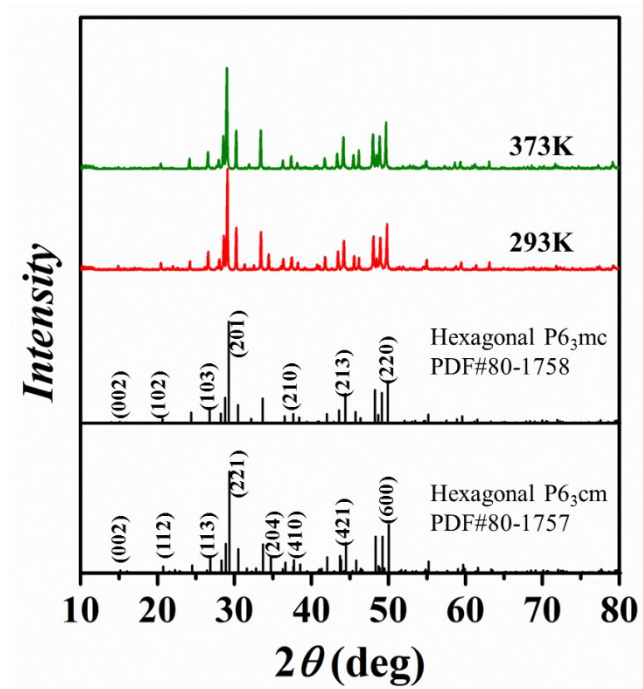

**Fig. S2** XRD patterns for  $\text{Cu}_8\text{GeSe}_6$  at 293K and 373K.

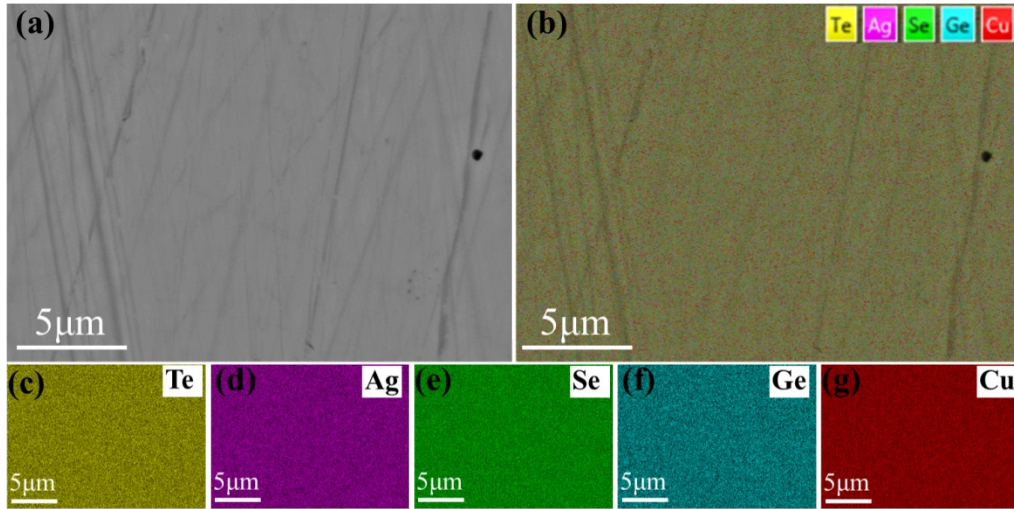

**Fig. S3** Scanning electron microscopy (SEM) images of  $\text{Cu}_{7.6}\text{Ag}_{0.4}\text{GeSe}_{5.1}\text{Te}_{0.9}$ . (a) Backscattered electron imaging map, (b) all elements, (c) Te, (d) Ag, (e) Se, (f) Ge, and (g) Cu mappings.

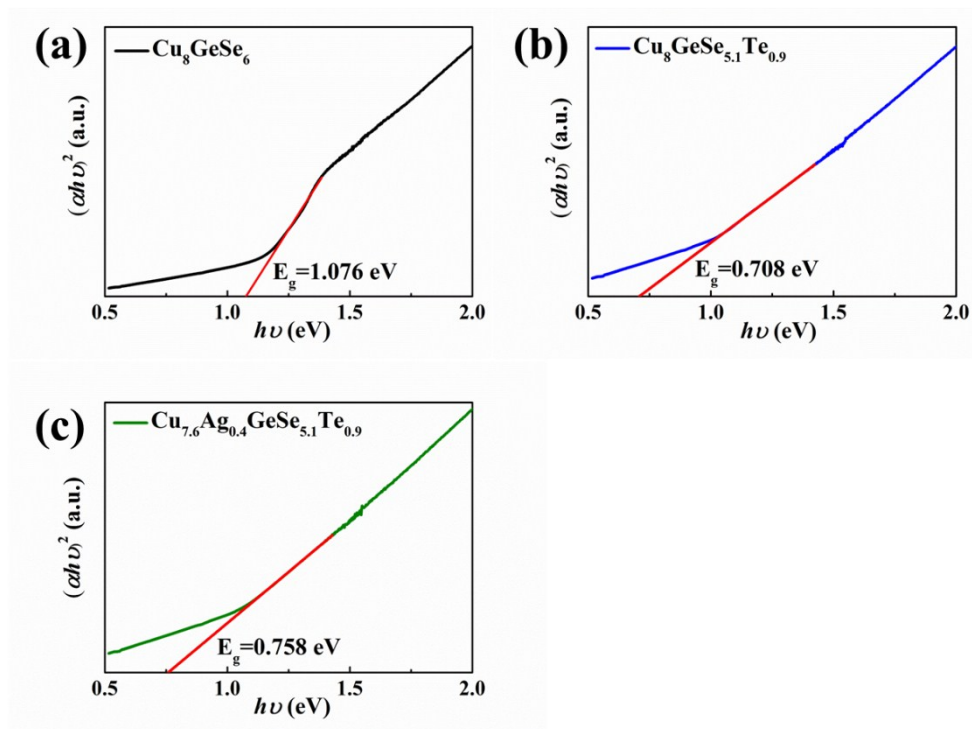

**Fig. S4**  $(\alpha h\nu)^2$  as a function of photon energy  $h\nu$ . An extrapolation of the spectra (red lines) is used to estimate optical band gap values for  $\text{Cu}_8\text{GeSe}_6$ ,  $\text{Cu}_8\text{GeSe}_{5.1}\text{Te}_{0.9}$  and  $\text{Cu}_{7.6}\text{Ag}_{0.4}\text{GeSe}_{5.1}\text{Te}_{0.9}$ .

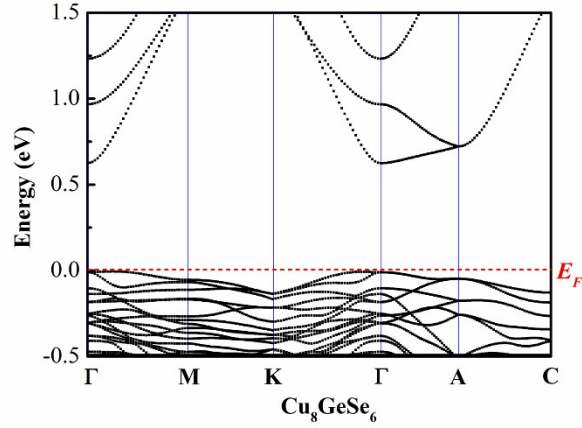

Fig. S5 Calculated band structure of low temperature phase  $\text{Cu}_8\text{GeSe}_6$  using revised PBE + 6U method. The Fermi level is set to zero. The calculated band structure indicates a direct transition. The CBM is mainly dominated by Se-4s and 4p bands, and the VBM is mainly from the Cu-3d and Se-4p bands, which indicates a direct allowed transition.

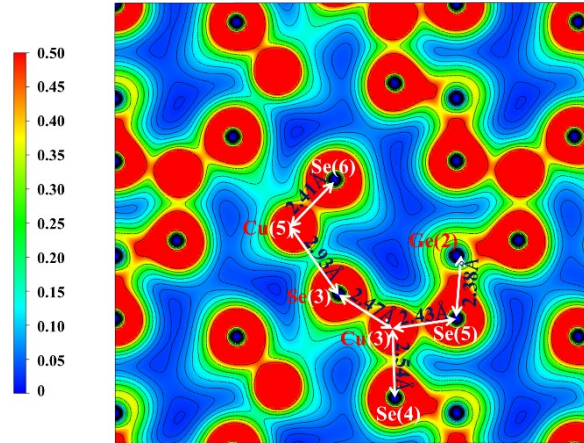

Fig. S6 Total charge density map of low-temperature phase  $\text{Cu}_8\text{GeSe}_6$ . The plot is on the Se(6)-Cu(5)-Se(3) plane. The unit is  $e/\text{\AA}^3$ . The contour lines are plotted from 0 to  $0.50 e/\text{\AA}^3$  with  $0.05 e/\text{\AA}^3$  intervals.

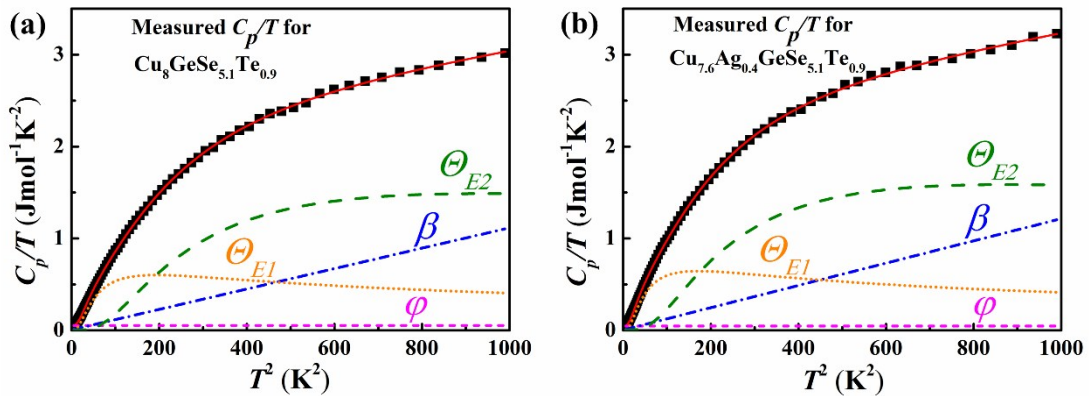

Fig. S7 Measured  $C_p/T$  versus  $T^2$  for  $\text{Cu}_8\text{GeSe}_{5.1}\text{Te}_{0.9}$  and  $\text{Cu}_{7.6}\text{Ag}_{0.4}\text{GeSe}_{5.1}\text{Te}_{0.9}$  (black

squares). The red solid line represents the fitted curve by using one Debye mode and two Einstein modes. The other lines represent the electronic term  $\varphi$ , Debye term  $\beta$ , and two Einstein terms,  $\Theta_{E1}$  and  $\Theta_{E2}$ .

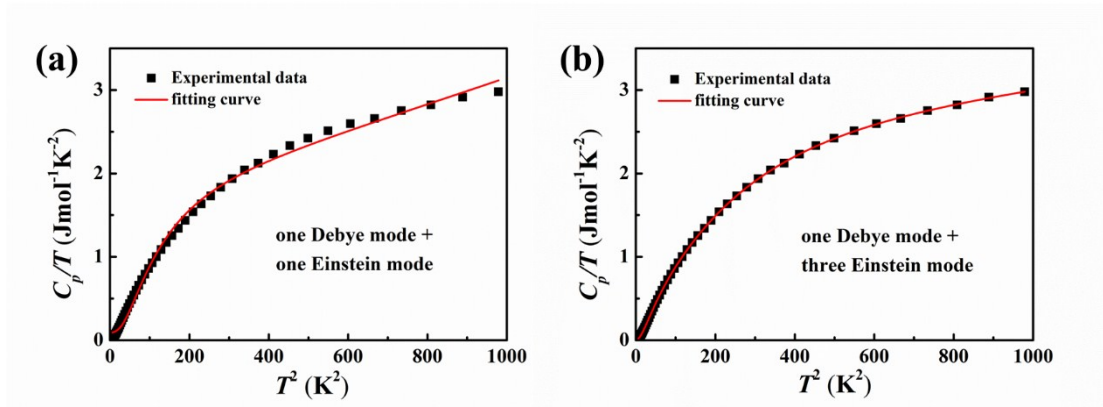

**Fig. S8** Measured  $C_p/T$  versus  $T^2$  for  $\text{Cu}_8\text{GeSe}_6$  (black squares). The red solid line represents the fitted curve by using different methods, (a) one Debye and one Einstein mode, (b) one Debye and three Einstein modes.

## References

- 1 D. T. Morelli, V. Jovovic, J. P. Heremans, *Phys. Rev. Lett.* 2008, **101**, 035901.
